# Supplementary material for: In Vivo Antiphytoviral and Aphid Repellency Activity of Essential Oils and Hydrosols from Mentha suaveolens and Foeniculum vulgare to Control Zucchini Yellow Mosaic Virus and Its Vector Aphis gossypii
Source: MDPI journal article supplement (doi:10.3390/plants12051078), 2023-02-28
Supplement: s1 [file s1]

# ***In vivo* antiphytoviral and aphid repellency activity of essential oils and hydrosols from *Foeniculum vulgare* and *Mentha suaveolens* to control zucchini yellow mosaic virus and its vector *Aphis gossypii***

Anna Taglienti <sup>1\*</sup>, Livia Donati <sup>1</sup>, Immacolata Dragone <sup>1</sup>, Luca Ferretti <sup>1</sup>, Andrea Gentili <sup>1</sup>, Fabrizio Araniti <sup>2</sup>, Filippo Sapienza <sup>3</sup>, Roberta Astolfi <sup>3</sup>, Simona Fiorentino <sup>4</sup>, Valerio Vecchiarelli <sup>4</sup>, Claudia Papalini <sup>5</sup>, Rino Ragno <sup>3</sup> and Sabrina Bertin <sup>1</sup>

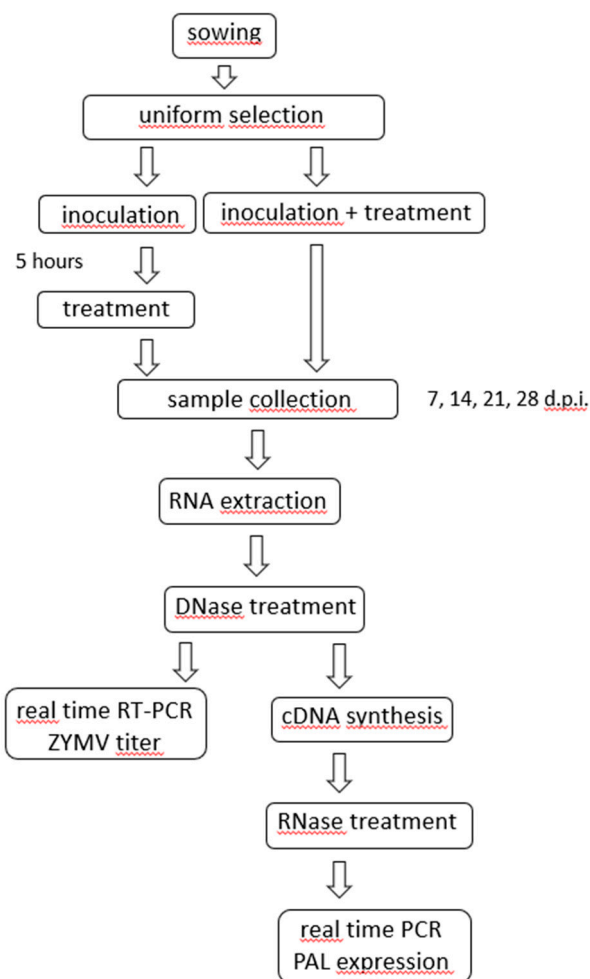

**Figure S1.** Flow diagram illustrating all treatments to plants and downstream analyses.

**Table S1.** Detailed chemical composition expressed as percentage of the Total Ion Current - TIC of EOs and HSs used in this study, as measured by GC-MS. Only compounds with relative abundance above 0.1% were reported. Retention index (RI) was calculated based on an alkane standard mixture (C8-C30), and values are expressed as a mean of three chromatographic replicate runs. MS EO = *M. suaveolens* essential oil, MS HS = *M. suaveolens* hydrosol, FV EO = *F. vulgare* essential oil, FV HS = *F. vulgare* hydrosol.

| Component                         | Mean RI | MS EO | MS HS | FV EO | FV HS |
|-----------------------------------|---------|-------|-------|-------|-------|
| <b>Monoterpene hydrocarbons</b>   |         | 21.13 | -     | 26.91 | 6.02  |
| α-thujene                         | 927.71  | 0.10  | -     | -     | -     |
| α-pinene                          | 934.90  | 3.11  | -     | 4.14  | 1.17  |
| camphene                          | 951.47  | -     | -     | 0.19  | -     |
| β-thujene                         | 975.98  | 1.52  | -     | 0.17  | 1.27  |
| β-pinene                          | 979.80  | 4.71  | -     | 1.78  | -     |
| β-myrcene                         | 991.67  | 3.05  | -     | 2.63  | 0.72  |
| α-phellandrene                    | 1009.07 | -     | -     | 3.99  | -     |
| α-terpinene                       | 1010.96 | -     | -     | 0.25  | -     |
| <i>o</i> -cymene                  | 1026.91 | 0.67  | -     | 7.87  | 0.66  |
| limonene                          | 1031.34 | -     | -     | 5.75  | 2.21  |
| menthene                          | 1032.33 | 7.28  | -     | -     | -     |
| γ-terpinene                       | 1046.00 | 0.14  | -     | 0.14  | -     |
| 3,7-dimethyl-1,3,6-octatriene     | 1048.60 | 0.14  | -     | -     | -     |
| α-terpinolene                     | 1086.83 | 0.11  | -     | -     | -     |
| 2-methylindan                     | 1091.85 | 0.30  | -     | -     | -     |
| <b>Oxygenated monoterpenes</b>    |         | 17.93 | 16.09 | 33.19 | 76.36 |
| eucalyptol                        | 1033.36 | 0.23  | 9.50  | 0.22  | 0.43  |
| fenchone                          | 1090.82 | -     | -     | 16.63 | 75.93 |
| linalool                          | 1098.85 | -     | 0.38  | -     | -     |
| camphor                           | 1147.34 | -     | 0.12  | 0.63  | -     |
| borneol                           | 1172.06 | -     | 1.12  | 0.11  | -     |
| terpinen-4-ol                     | 1180.61 | -     | 1.28  | 0.11  | -     |
| <i>a</i> -terpineol               | 1181.31 | -     | 1.65  | 1.08  | -     |
| 3-decanone                        | 1183.81 | 0.17  | -     | -     | -     |
| <i>p</i> -cymen-8-ol              | 1187.56 | 1.23  | 1.03  | -     | -     |
| myrtenol                          | 1196.81 | 0.42  | -     | -     | -     |
| estragole                         | 1200.04 | -     | -     | 2.66  | -     |
| carveol                           | 1204.85 | -     | -     | 0.32  | -     |
| 4,7-dimethylbenzofuran            | 1215.84 | 0.29  | -     | -     | -     |
| 1-(2,4-dimethylphenyl)-ethanone   | 1217.77 | 0.88  | -     | -     | -     |
| (S)-carvone                       | 1245.53 | 0.12  | -     | -     | -     |
| (S)-phellandral                   | 1260.79 | 0.27  | -     | -     | -     |
| isopiperitenone                   | 1270.45 | 0.85  | 1.01  | -     | -     |
| anethol                           | 1276.34 | -     | -     | 10.84 | -     |
| piperitenone                      | 1339.86 | 0.82  | -     | -     | -     |
| durenol                           | 1360.57 | 0.59  | -     | 0.59  | -     |
| isomintlactone                    | 1371.90 | 7.72  | -     | -     | -     |
| 4-methoxyphenylacetone            | 1384.70 | 0.12  | -     | -     | -     |
| <i>cis</i> -isoeugenol            | 1395.34 | 0.39  | -     | -     | -     |
| nepetalactone                     | 1398.86 | 3.83  | -     | -     | -     |
| <b>Sesquiterpene hydrocarbons</b> |         | 2.51  | -     | 0.12  | -     |
| copaene                           | 1378.01 | 0.11  | -     | -     | -     |
| β-bourbonene                      | 1385.72 | 0.37  | -     | -     | -     |
| <i>cis</i> -β-elemene             | 1391.39 | 0.26  | -     | -     | -     |
| α-bergamotene                     | 1434.27 | -     | -     | 0.117 | -     |
| <i>cis</i> -murolo-4(15),5-diene  | 1463.18 | 1.77  | -     | -     | -     |
| <b>Phenolic compounds</b>         |         | 4.11  | 3.94  | 0.10  | -     |
| sesamol                           | 1286.67 | 0.24  | -     | -     | -     |
| thymol                            | 1295.97 | 3.87  | 3.94  | 0.10  | -     |
| <b>Alcohols</b>                   |         | 7.55  | 1.52  | -     | -     |
| 1-octen-3-ol                      | 980.56  | 6.39  | 0.45  | -     | -     |

|                                            |         |             |              |              |       |
|--------------------------------------------|---------|-------------|--------------|--------------|-------|
| 3-octanol                                  | 998.16  | 0.58        | 1.07         | -            | -     |
| 1-nonen-3-ol                               | 1083.10 | 0.58        |              | -            | -     |
| <b>Esters</b>                              |         | <b>9.85</b> | <b>4.74</b>  | <b>18.47</b> | -     |
| isobutyl isovalerate                       | 1005.34 | 0.13        | -            | -            | -     |
| 1-octen-3-yl-acetate                       | 1110.30 | 2.31        | -            | -            | -     |
| 3-octanol acetate                          | 1122.11 | 0.25        | -            | -            | -     |
| 3-hexenyl valerate                         | 1238.15 | 0.31        | -            | -            | -     |
| pentanedioic acid, (p-t-butylphenyl)ester) | 1297.67 | -           | -            | 18.47        | -     |
| geranyl acetate                            | 1371.17 | 6.84        | -            | -            | -     |
| cytronellyl acetate                        | 1357.88 | -           | 4.74         | -            | -     |
| <b>Aromatic compounds</b>                  |         | <b>1.21</b> | -            | <b>11.93</b> | -     |
| veratrole                                  | 1135.85 | 1.21        | -            | -            | -     |
| 4-methoxybenzaldehyde                      | 1260.79 | -           | -            | 4.52         | -     |
| 1,2-dimethoxy-4-vinylbenzene               | 1381.03 | -           | -            | 1.65         | -     |
| 4-methoxyphenylacetone                     | 1383.92 | -           | -            | 5.76         | -     |
| <b>Nitrogen compounds</b>                  |         | -           | <b>68.46</b> | <b>1.14</b>  | -     |
| N,N-Diethyl-m-toluidine                    | 1292.31 | -           | -            | 1.14         | -     |
| decanenitrile                              | 1293.54 | -           | 68.46        | -            | -     |
| <b>Oxygenated heterobiyclic</b>            |         | <b>0.87</b> | -            | -            | -     |
| dihydroedulan II                           | 1294.32 | 0.87        | -            | -            | -     |
| Total identified                           |         | 83.00       | 94.75        | 92.45        | 82.38 |
